# Supplementary material for: Dissecting the role of transforming growth factor-β1 in topmouth culter immunobiological activity: a fundamental functional analysis
Source: PubMed Central journal article supplement (PMC4890032; doi:10.1038/srep27179), 2016-06-02
Supplement: srep27179-s1.pdf [file srep27179-s1.pdf]

Dissecting the role of transforming growth factor-beta1 in topmouth culter immunobiological activity: a fundamental and functional analysis

Pengzhi Qi<sup>a,\*</sup>, Congxin Xie<sup>b</sup>, Baoying Guo<sup>a</sup>, Changwen Wu<sup>a</sup>

<sup>a</sup> *National Engineering Research Center of Marine Facilities Aquaculture, Marine Science and Technology College, Zhejiang Ocean University, Zhoushan 316004, China*

<sup>b</sup> *College of Fisheries, Huazhong Agricultural University, Wuhan 430070, China*

\* Corresponding author. Tel.: +86 580 2554818 Fax: +86 580 2554818

*E-mail address:* qpz2004@sina.com

**Fig S1. Nucleotide and deduced amino acid sequence of *cTGF-β1*.** The GenBank accession number is KJ704192.

**Fig S2. The SDS-PAGE analysis for the expression *in vitro* of the *cTGF-β1* mature peptide portion.** M, protein molecular weight marker; lane 1, 4-6, lysates of transformed bacteria after induction with IPTG; lane 2, 3 and 7, lysates of transformed bacteria of non-inserted control.

**Fig S3. Western blot analysis of recombinant *cTGF-β1* using anti-6×His tag mouse antibody.** M, protein molecular weight marker; lane 1-6, the expression of recombinant *cTGF-β1* mature peptide portion.

|      |                                                |      |                                                |
|------|------------------------------------------------|------|------------------------------------------------|
| 1    | acggaggccatgcgcgtgcctgggaaggtgtgtggtccgggggcc  | 1115 | tcagaagatgaagaaagtttagaactgaggttgactgtggctgt   |
| 46   | gcgtcagattctttctttccctggcgcggtgaggaaccgcgcgc   |      | S E D E E S L E L R L Y C G C                  |
| 91   | gaggcagtcgggggtacgtggcggttaaacgcgacagggatctagt | 1160 | aagacagaccagcagagtagacagataaatctctctttactatata |
| 136  | ttccgacagacatgtaatgcttacatatactatgttcaagtcag   |      | K T D Q Q S T D K F L F T I S                  |
| 181  | cactaggccgtgttcagggtatacactagtaattgcatggctctca | 1205 | ggactggacaacacagagaggcgacactgccagtctggcagatag  |
| 226  | ctaagtttgtttatattgggacaggggttgcctcatttgccaaac  |      | G L D K Q R G D T A S L A D M                  |
| 271  | tgcaactgcactgtctggatggaactctgaaacagatgatgtgca  | 1250 | atggtgaagccttacattttggctttatctttgccctctaacggc  |
| 316  | ggaatttcccatattagaaagacatcagctgttctgttggctcag  |      | M V K P Y I L A L S L P S N G                  |
| 361  | tattcaaggtgctttccagaatcatcatcaggtagcatcacctc   | 1295 | aactcccttgcatccggtcgcagtaaacagagatgttggcactgat |
| 406  | cataaccagcaacactactgtgtttgtttgatccagacgctctac  |      | N S L A S G R S K R D V G T D                  |
| 451  | gtcaattacagactctttctgaacctctctccttacttaaatctg  | 1340 | gtaacttgtgatgaaaaactgagacctgttgtatgctgaagctt   |
| 496  | ttctaaaagacagittgggctcagatttggcacc             |      | V T C D E K T E T C C M R K L                  |
| 530  | atgaggtttgtttgcttagtactgacggccctgtgcatgggtgct  | 1385 | tatattgactttcggaaagatctgggctggaagtggatccacaag  |
|      | M R F V C L V L T A L C M V A                  |      | Y I D F R K D L G W K W I H K                  |
| 575  | ggaacgggcagtatgtccactgcaagactctggacctggaggtg   | 1430 | cccaaaggatactatgctaactactgcatgggctcctgcacctac  |
|      | G T G S M S T C K T L D L E V                  |      | P K G Y Y A N Y C M G S C T Y                  |
| 620  | gtgaagaagaacggatagaggtatccgcggtcagatctctcagc   | 1475 | atctggaatgctgagaacaaatactctcagatattagccttgta   |
|      | V K K K R I E A I R G Q I L S                  |      | I W N A E N K Y S Q I L A L Y                  |
| 665  | aaattgcatggtgaaagagcctgaatcgagatagacgatgtt     | 1520 | aaacaccacaacctgggtgcatctgctcagccatgttgcgtacct  |
|      | K L R M V K E P E S E I D D V                  |      | K H H N P G A S A Q P C C V P                  |
| 710  | ggacaaaagatcccagattccttgcctttctttgtacaacagcact | 1565 | gcagtctcagacctctaccaattcttactatgtggaagacaa     |
|      | G Q K I P D S L L S L Y N S T                  |      | A V L D P L P I L Y Y V G R Q                  |
| 755  | gttgaactgagcgaagaaatgaagctgaagactgtccctctcag   | 1610 | aacaagtgaggagcagttgtccaacatggtggtgaggagctgcaag |
|      | V E L S E E M K L K T V P L Q                  |      | N K V E Q L S N M V V R S C K                  |
| 800  | gctgaagatgaggactactttggcaaggaggtgcacaagttcatt  | 1655 | tgcagttaa 1663                                 |
|      | A E D E D Y F G K E V H K F I                  |      | C S *                                          |
| 845  | atccggcaagctcagaatggcacaagcagatggttttttaatt    | 1664 | agtatgactatataacattattttattttcagaaagtgctccatgg |
|      | I R Q A Q N G T K H Q M F F N                  |      |                                                |
| 890  | gtatcagagatgagacagatattccagactaccggctgctgtct   | 1709 | cactatctctctctggacgattagtaagcaaacacacagatagat  |
|      | V S E M R Q S I P D Y R L L S                  |      |                                                |
| 935  | caagcagagttacggcttcggattaagaatcccaccatggaccaa  | 1754 | gaacatataaagtatcactgggaaggagaatcaggaactgagaca  |
|      | Q A E L R L R I K N P T M D Q                  |      |                                                |
| 980  | gagcagaggctggaactgtatcgtggagtaggtgatcaggctcga  | 1799 | actgacaaggatgggaaaaggagaaggagagctctgttaaaaaa   |
|      | E Q R L E L Y R G V G D Q A R                  |      |                                                |
| 1025 | tatctgggcaccgctttgtctccaaggattggtccaatcgctgg   | 1844 | ataggagggaaaaataaacaggggaataaaaaatctttgaaaa    |
|      | Y L G T R F V S K D W S N R W                  |      |                                                |
| 1070 | ctctcgtttgatgtgaacagacgatgacagaatggctgcagagt   | 1889 | tgagactttctcagccatgccctctacagtggcacaagtgcaca   |
|      | L S F D V K Q T M T E W L Q S                  |      |                                                |
|      |                                                | 1934 | caaaggcattccgttaaagcacttcacaaaaaagctcaatatca   |
|      |                                                | 1979 | aaccataatatactgtttgtatctttttatgtttatttaccatta  |
|      |                                                | 2024 | ctcattccattaatattatgtgctgttgaagttcataatttgat   |
|      |                                                | 2069 | tataccatgaggtagtctgttagcattgcacccaaatgtacaa    |
|      |                                                | 2114 | tgaagatttctaagtgctgtactgataaaggaaatgatgtcaa    |
|      |                                                | 2159 | aaaaaaaaaaaaaaaa                               |

**Fig S1. Nucleotide and deduced amino acid sequence of *cTGF-β1*.** The GenBank accession number is KJ704192.

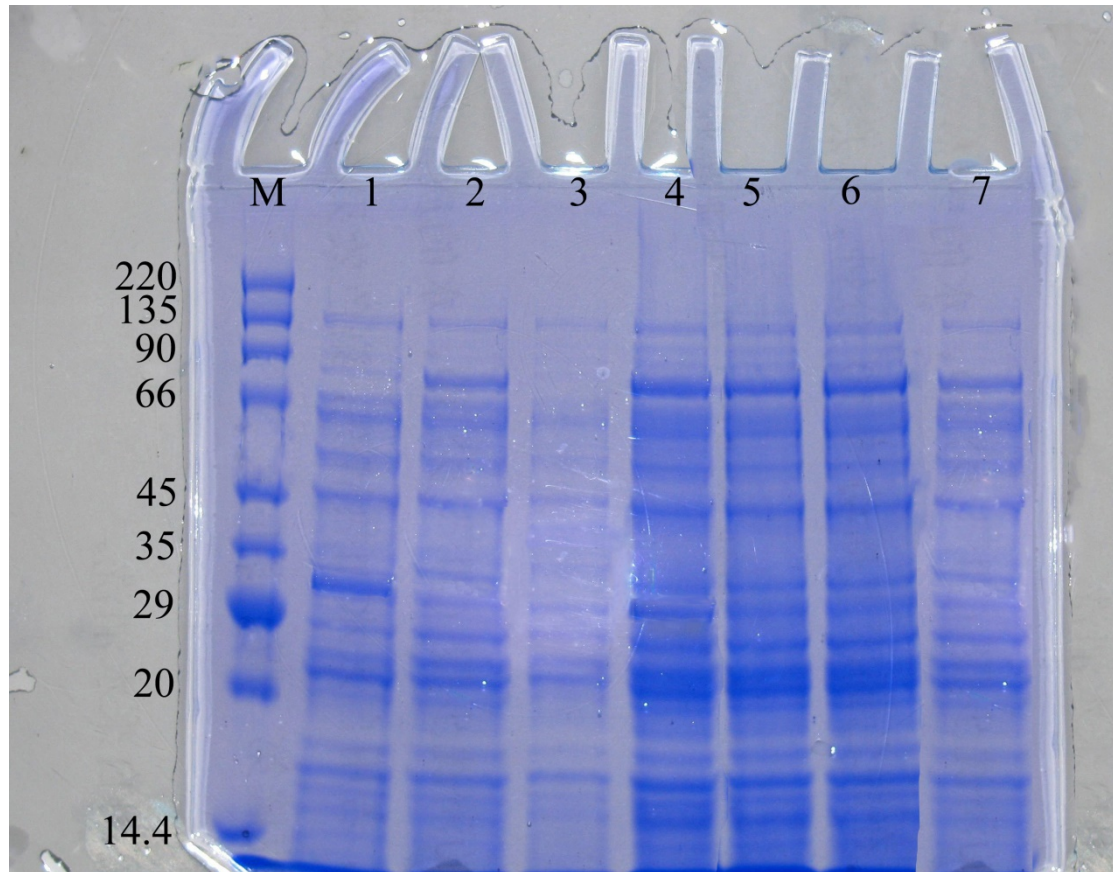

**Fig S2.** The SDS-PAGE analysis for the expression *in vitro* of the *cTGF-β1* **mature peptide portion.** M, protein molecular weight marker; lane 1, 4-6, lysates of transformed bacteria after induction with IPTG; lane 2, 3 and 7, lysates of transformed bacteria of non-inserted control.

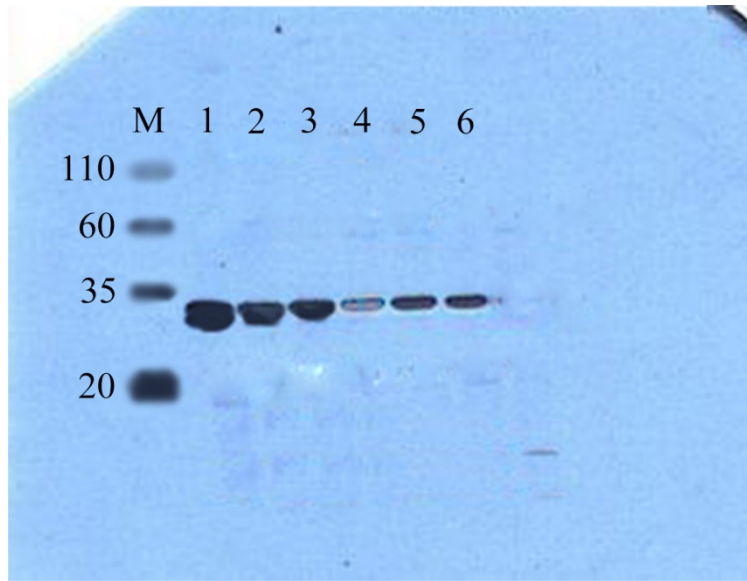

**Fig S3. Western blot analysis of recombinant *cTGF-β1* using anti-6×His tag mouse antibody.** M, protein molecular weight marker; lane 1-6, the expression of recombinant *cTGF-β1* mature peptide portion.
